# Supplementary material for: Increased grazing drives homogenisation but reduced grazing increases turnover in upland habitat mosaics
Source: Springer Nature journal article supplement (doi:10.1007/s10531-021-02305-5), 2021-10-18
Supplement: MOESM1 [file 19769818]

Supplementary Material.

BIOC-D-20-00490

Increased grazing drives homogenisation but reduced grazing increases turnover in upland habitat mosaics.

Biodiversity and Conservation

Robin J Pakeman and Debbie A Fielding

The James Hutton Institute, Craigiebuckler, Aberdeen, AB15 8QH, UK

[robin.pakeman@hutton.ac.uk](mailto:robin.pakeman@hutton.ac.uk)

Figure A1. Distribution of the six blocks in three groups of two around the estate.


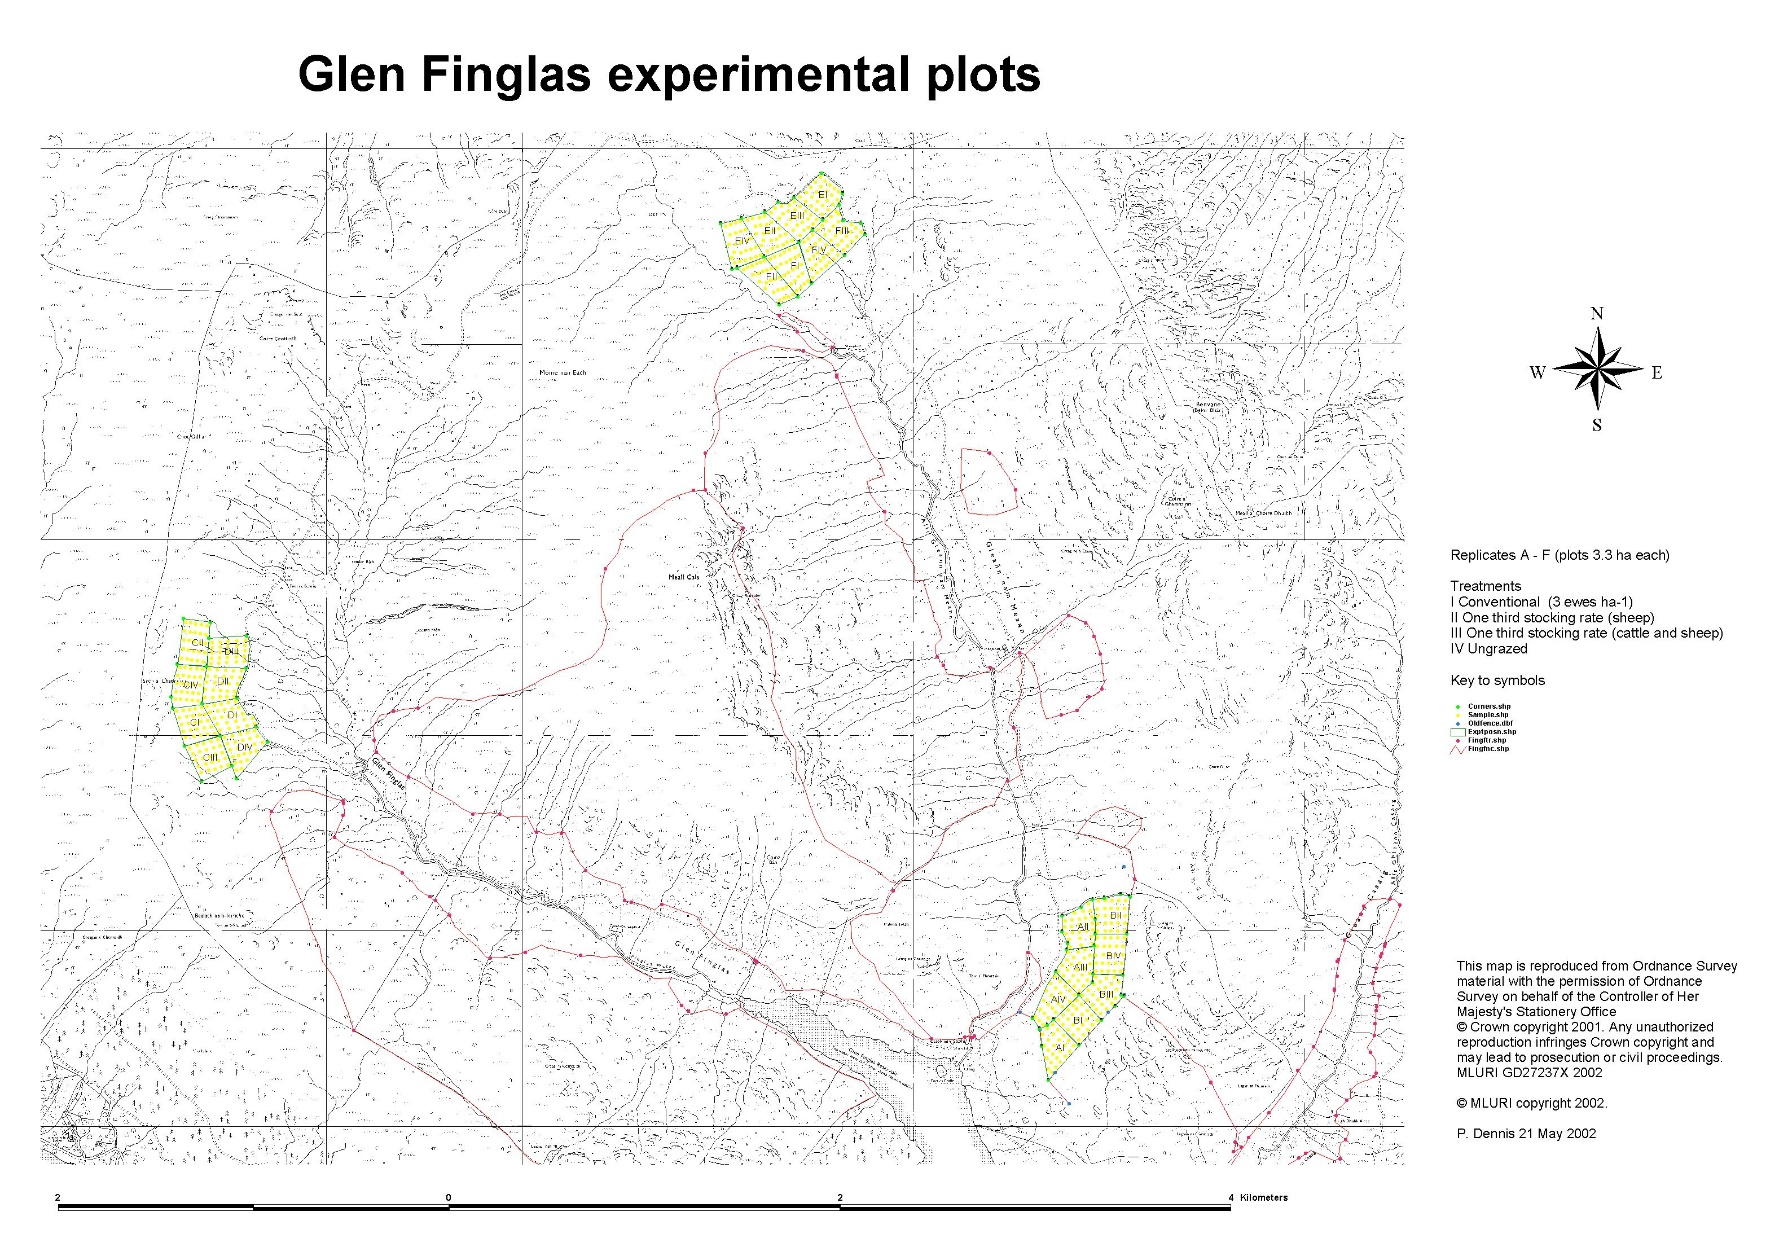


Figure A2. Approximate location of sampling points in the experimental plots. The blocks (A-F) are arranged in the same geometry as the appear in Figure A1. Treatment numbering: I represents High, II Continued, III Mixed and IV None.

Table A1. Full outputs of the mixed model testing temporal species beta diversity across all vegetation communities. t and p values represent contrasts with the Continued treatment, df=591. Species beta diversity is divided into dBC-bal (balanced variation in abundance), dBC-gra (abundance gradients) and their sum dBC. Contrasts where p ≤ 0.05 are shown in bold.

|  | Estimate | Std. Error | df | t value | Pr(>|t|) |
| --- | --- | --- | --- | --- | --- |
| dBC-bal |  |  |  |  |  |
| Intercept | 0.526 | 0.034 | 6.801 | 15.365 | <0.001 |
| High | 0.005 | 0.021 | 591 | 0.227 | 0.821 |
| Mixed | 0.007 | 0.021 | 591 | 0.336 | 0.737 |
| **None** | **0.043** | **0.021** | **591** | **2.027** | **0.043** |
| dBC-gra |  |  |  |  |  |
| Intercept | 0.139 | 0.018 | 6.454 | 7.873 | <0.001 |
| **High** | **-0.020** | **0.010** | **591** | **-2.035** | **0.042** |
| **Mixed** | **-0.023** | **0.010** | **591** | **-2.300** | **0.022** |
| **None** | **-0.021** | **0.010** | **591** | **-2.065** | **0.039** |
| dBC |  |  |  |  |  |
| Intercept | 0.666 | 0.021 | 8.525 | 32.135 | <0.001 |
| High | -0.016 | 0.016 | 591 | -0.951 | 0.342 |
| Mixed | -0.016 | 0.016 | 591 | -0.973 | 0.331 |
| None | 0.022 | 0.016 | 591 | 1.351 | 0.177 |

Table A2. Full output of the mixed models testing temporal species beta diversity by vegetation communities. t and p values represent contrasts with the Continued treatment and the M15 wet heath community, df=571. Species beta diversity is divided into dBC-bal (balanced variation in abundance), dBC-gra (abundance gradients) and their sum dBC. Contrasts where p ≤ 0.05 are shown in bold.

|  | Estimate | Std. Error | df | t value | Pr>|t| |
| --- | --- | --- | --- | --- | --- |
| dBC-bal |  |  |  |  |  |
| Intercept | 0.432 | 0.038 | 23.581 | 11.493 | <0.001 |
| High | 0.075 | 0.040 | 571.377 | 1.855 | 0.064 |
| Mixed | 0.051 | 0.042 | 571.136 | 1.216 | 0.224 |
| **None** | **0.093** | **0.040** | **571.699** | **2.347** | **0.019** |
| M25 | -0.003 | 0.059 | 572.920 | -0.056 | 0.955 |
| M6 | 0.059 | 0.043 | 573.252 | 1.377 | 0.169 |
| U20 | 0.115 | 0.078 | 571.381 | 1.474 | 0.141 |
| **U4** | **0.249** | **0.064** | **572.816** | **3.911** | **<0.001** |
| **U5** | **0.178** | **0.039** | **575.937** | **4.549** | **<0.001** |
| High:M25 | 0.087 | 0.077 | 571.815 | 1.126 | 0.261 |
| Mixed:M25 | 0.011 | 0.081 | 571.705 | 0.135 | 0.893 |
| None:M25 | 0.090 | 0.079 | 571.768 | 1.137 | 0.256 |
| High:M6 | -0.040 | 0.059 | 572.320 | -0.690 | 0.490 |
| Mixed:M6 | -0.035 | 0.059 | 571.516 | -0.591 | 0.555 |
| None:M6 | -0.028 | 0.061 | 571.347 | -0.459 | 0.647 |
| High:U20 | 0.007 | 0.115 | 571.582 | 0.057 | 0.955 |
| Mixed:U20 | 0.007 | 0.096 | 572.495 | 0.078 | 0.938 |
| None:U20 | -0.122 | 0.101 | 572.940 | -1.206 | 0.228 |
| **High:U4** | **-0.181** | **0.084** | **572.507** | **-2.139** | **0.033** |
| Mixed:U4 | -0.088 | 0.092 | 571.558 | -0.949 | 0.343 |
| **None:U4** | **-0.210** | **0.088** | **572.967** | **-2.377** | **0.018** |
| **High:U5** | **-0.186** | **0.057** | **571.394** | **-3.269** | **0.001** |
| Mixed:U5 | -0.092 | 0.058 | 571.088 | -1.598 | 0.111 |
| None:U5 | -0.086 | 0.055 | 572.467 | -1.570 | 0.117 |
| dBC-gra |  |  |  |  |  |
| Intercept | 0.172 | 0.020 | 16.105 | 8.591 | <0.001 |
| High | -0.023 | 0.019 | 571.281 | -1.185 | 0.236 |
| **Mixed** | **-0.041** | **0.020** | **571.119** | **-2.043** | **0.041** |
| **None** | **-0.047** | **0.019** | **571.493** | **-2.489** | **0.013** |
| M25 | -0.039 | 0.028 | 572.345 | -1.365 | 0.173 |
| M6 | -0.006 | 0.021 | 572.587 | -0.300 | 0.764 |
| U20 | -0.045 | 0.038 | 571.281 | -1.188 | 0.235 |
| **U4** | **-0.087** | **0.031** | **572.270** | **-2.832** | **0.005** |
| **U5** | **-0.059** | **0.019** | **575.181** | **-3.166** | **0.002** |
| High:M25 | -0.012 | 0.037 | 571.571 | -0.334 | 0.739 |
| Mixed:M25 | 0.020 | 0.039 | 571.497 | 0.516 | 0.606 |
| None:M25 | -0.010 | 0.038 | 571.540 | -0.274 | 0.784 |
| High:M6 | -0.031 | 0.028 | 571.926 | -1.098 | 0.272 |
| Mixed:M6 | 0.007 | 0.028 | 571.372 | 0.240 | 0.811 |
| None:M6 | 0.008 | 0.029 | 571.260 | 0.282 | 0.778 |
| High:U20 | -0.033 | 0.055 | 571.419 | -0.594 | 0.553 |
| Mixed:U20 | -0.006 | 0.046 | 572.054 | -0.137 | 0.891 |
| None:U20 | 0.068 | 0.049 | 572.352 | 1.405 | 0.161 |
| High:U4 | 0.036 | 0.041 | 572.065 | 0.884 | 0.377 |
| Mixed:U4 | 0.028 | 0.044 | 571.403 | 0.639 | 0.523 |
| **None:U4** | **0.100** | **0.042** | **572.383** | **2.356** | **0.019** |
| High:U5 | 0.031 | 0.027 | 571.290 | 1.141 | 0.254 |
| Mixed:U5 | 0.045 | 0.028 | 571.089 | 1.626 | 0.105 |
| None:U5 | 0.048 | 0.026 | 572.019 | 1.847 | 0.065 |
| dBC |  |  |  |  |  |
| Intercept | 0.603 | 0.025 | 58.977 | 23.662 | <0.001 |
| High | 0.052 | 0.031 | 571.846 | 1.665 | 0.096 |
| Mixed | 0.010 | 0.033 | 571.345 | 0.297 | 0.766 |
| None | 0.045 | 0.031 | 572.539 | 1.455 | 0.146 |
| M25 | -0.043 | 0.046 | 574.658 | -0.935 | 0.350 |
| M6 | 0.054 | 0.034 | 575.107 | 1.611 | 0.108 |
| U20 | 0.071 | 0.061 | 571.879 | 1.161 | 0.246 |
| **U4** | **0.163** | **0.050** | **574.508** | **3.273** | **0.001** |
| **U5** | **0.120** | **0.030** | **572.011** | **3.945** | **<0.001** |
| High:M25 | 0.075 | 0.060 | 572.781 | 1.235 | 0.217 |
| Mixed:M25 | 0.029 | 0.063 | 572.556 | 0.461 | 0.645 |
| None:M25 | 0.080 | 0.062 | 572.682 | 1.297 | 0.195 |
| High:M6 | -0.074 | 0.046 | 573.645 | -1.607 | 0.109 |
| Mixed:M6 | -0.028 | 0.046 | 572.154 | -0.608 | 0.543 |
| None:M6 | -0.020 | 0.047 | 571.790 | -0.418 | 0.676 |
| High:U20 | -0.025 | 0.090 | 572.258 | -0.276 | 0.783 |
| Mixed:U20 | 0.003 | 0.075 | 573.897 | 0.045 | 0.964 |
| None:U20 | -0.051 | 0.079 | 574.739 | -0.646 | 0.519 |
| High:U4 | -0.142 | 0.066 | 573.899 | -2.158 | 0.031 |
| Mixed:U4 | -0.058 | 0.072 | 572.208 | -0.802 | 0.423 |
| None:U4 | -0.105 | 0.069 | 574.697 | -1.531 | 0.126 |
| **High:U5** | **-0.155** | **0.044** | **571.904** | **-3.488** | **<0.001** |
| Mixed:U5 | -0.047 | 0.045 | 571.226 | -1.035 | 0.301 |
| None:U5 | -0.036 | 0.043 | 573.978 | -0.854 | 0.393 |

Table 3. Full output of the mixed models of changes in within plot spatial species beta diversity through time. t and p values represent contrasts with the Continued treatment, df=20. Species beta diversity is divided into dBC-bal (balanced variation in abundance), dBC-gra (abundance gradients) and their sum dBC. Contrasts where p ≤ 0.05 are shown in bold.

|  | Estimate | Std. Error | df | t value | Pr>|t| |
| --- | --- | --- | --- | --- | --- |
| dBC-bal |  |  |  |  |  |
| Intercept | -1.429 | 2.087 | 20.004 | -0.685 | 0.501 |
| **High** | **8.053** | **2.951** | **20.002** | **2.729** | **0.013** |
| Mixed | 4.759 | 2.951 | 20.002 | 1.612 | 0.123 |
| None | 2.421 | 2.951 | 20.002 | 0.820 | 0.422 |
| Year | 0.001 | 0.001 | 20.000 | 0.983 | 0.337 |
| **High:Year** | **-0.004** | **0.001** | **20.000** | **-2.730** | **0.013** |
| Mixed:Year | -0.002 | 0.001 | 20.000 | -1.615 | 0.122 |
| None:Year | -0.001 | 0.001 | 20.000 | -0.814 | 0.425 |
| dBC-gra |  |  |  |  |  |
| Intercept | 1.957 | 0.902 | 35.000 | 2.170 | 0.037 |
| High | -1.832 | 1.275 | 35.000 | -1.437 | 0.160 |
| Mixed | -0.001 | 1.275 | 35.000 | -0.001 | 0.999 |
| None | -0.047 | 1.275 | 35.000 | -0.037 | 0.971 |
| **Year** | **-0.001** | **0.000** | **35.000** | **-2.108** | **0.042** |
| High:Year | 0.001 | 0.001 | 35.000 | 1.433 | 0.161 |
| Mixed:Year | 0.000 | 0.001 | 35.000 | -0.004 | 0.997 |
| None:Year | 0.000 | 0.001 | 35.000 | 0.032 | 0.974 |
| dBC |  |  |  |  |  |
| Intercept | 0.528 | 2.016 | 20.000 | 0.262 | 0.796 |
| **High** | **6.221** | **2.850** | **20.000** | **2.182** | **0.041** |
| Mixed | 4.758 | 2.850 | 20.000 | 1.669 | 0.111 |
| None | 2.373 | 2.850 | 20.000 | 0.833 | 0.415 |
| Year | 0.000 | 0.001 | 20.000 | 0.075 | 0.941 |
| **High:Year** | **-0.003** | **0.001** | **20.000** | **-2.185** | **0.041** |
| Mixed:Year | -0.002 | 0.001 | 20.000 | -1.674 | 0.110 |
| None:Year | -0.001 | 0.001 | 20.000 | -0.829 | 0.417 |

Table A4. Full output of the mixed models testing temporal functional beta diversity across all vegetation communities. t and p values represent contrasts with the Continued treatment, df=591. Functional beta diversity is divided into functional turnover Fun-βturn and nestedness-resultant functional dissimilarity Fun-βnest and their sum Fun-β. Contrasts where p ≤ 0.05 are shown in bold.

|  | Estimate | Std. Error | df | t value | Pr>|t| |
| --- | --- | --- | --- | --- | --- |
| Fun-βturn |  |  |  |  |  |
| Intercept | 0.242 | 0.024 | 596 | 9.887 | <0.001 |
| High | 0.007 | 0.035 | 596 | 0.214 | 0.831 |
| Mixed | 0.049 | 0.035 | 596 | 1.412 | 0.158 |
| **None** | **0.100** | **0.035** | **596** | **2.899** | **0.004** |
| Fun-βnest |  |  |  |  |  |
| Intercept | 0.352 | 0.023 | 596 | 15.491 | <0.001 |
| High | -0.032 | 0.032 | 596 | -1.001 | 0.317 |
| Mixed | -0.006 | 0.032 | 596 | -0.177 | 0.860 |
| **None** | **-0.074** | **0.032** | **596** | **-2.297** | **0.022** |
| Fun-β |  |  |  |  |  |
| Intercept | 0.594 | 0.021 | 27.992 | 27.877 | <0.001 |
| High | -0.025 | 0.027 | 591 | -0.934 | 0.351 |
| Mixed | 0.043 | 0.027 | 591 | 1.629 | 0.104 |
| None | 0.027 | 0.027 | 591 | 1.000 | 0.318 |

Table A5. Full output of the mixed models testing temporal functional beta diversity by vegetation communities. t and p values represent contrasts with the Continued treatment and the M15 wet heath community, df=571. Functional beta diversity is divided into functional turnover Fun-βturn and nestedness-resultant functional dissimilarity Fun-βnest and their sum Fun-β. Contrasts where p ≤ 0.05 are shown in bold.

|  | Estimate | Std. Error | df | t value | Pr>|t| |
| --- | --- | --- | --- | --- | --- |
| Fun-βturn |  |  |  |  |  |
| Intercept | 0.164 | 0.048 | 576 | 3.433 | <0.001 |
| High | 0.082 | 0.067 | 576 | 1.215 | 0.225 |
| Mixed | 0.063 | 0.071 | 576 | 0.893 | 0.372 |
| **None** | **0.210** | **0.067** | **576** | **3.156** | **0.002** |
| M25 | 0.127 | 0.099 | 576 | 1.286 | 0.199 |
| M6 | 0.073 | 0.071 | 576 | 1.028 | 0.304 |
| U20 | 0.139 | 0.131 | 576 | 1.059 | 0.290 |
| U4 | 0.201 | 0.106 | 576 | 1.900 | 0.058 |
| U5 | 0.096 | 0.064 | 576 | 1.505 | 0.133 |
| High:M25 | -0.107 | 0.129 | 576 | -0.827 | 0.409 |
| Mixed:M25 | -0.159 | 0.136 | 576 | -1.169 | 0.243 |
| None:M25 | -0.069 | 0.132 | 576 | -0.523 | 0.601 |
| High:M6 | -0.078 | 0.098 | 576 | -0.794 | 0.428 |
| Mixed:M6 | -0.027 | 0.099 | 576 | -0.268 | 0.789 |
| None:M6 | -0.133 | 0.102 | 576 | -1.307 | 0.192 |
| High:U20 | -0.237 | 0.193 | 576 | -1.224 | 0.221 |
| Mixed:U20 | -0.124 | 0.160 | 576 | -0.777 | 0.437 |
| None:U20 | -0.191 | 0.168 | 576 | -1.136 | 0.257 |
| High:U4 | -0.170 | 0.141 | 576 | -1.207 | 0.228 |
| Mixed:U4 | 0.079 | 0.155 | 576 | 0.511 | 0.610 |
| None:U4 | -0.176 | 0.147 | 576 | -1.198 | 0.231 |
| High:U5 | -0.087 | 0.095 | 576 | -0.913 | 0.362 |
| Mixed:U5 | 0.056 | 0.097 | 576 | 0.578 | 0.564 |
| **None:U5** | **-0.187** | **0.091** | **576** | **-2.047** | **0.041** |
| Fun-βnest |  |  |  |  |  |
| Intercept | 0.357 | 0.045 | 576 | 8.022 | <0.001 |
| High | -0.074 | 0.063 | 576 | -1.176 | 0.240 |
| Mixed | 0.023 | 0.066 | 576 | 0.350 | 0.727 |
| None | -0.070 | 0.062 | 576 | -1.137 | 0.256 |
| M25 | 0.061 | 0.092 | 576 | 0.664 | 0.507 |
| M6 | -0.003 | 0.066 | 576 | -0.038 | 0.970 |
| U20 | -0.072 | 0.122 | 576 | -0.589 | 0.556 |
| U4 | -0.107 | 0.099 | 576 | -1.080 | 0.281 |
| U5 | 0.000 | 0.059 | 576 | 0.002 | 0.999 |
| High:M25 | 0.044 | 0.120 | 576 | 0.370 | 0.711 |
| Mixed:M25 | 0.026 | 0.126 | 576 | 0.209 | 0.835 |
| None:M25 | -0.062 | 0.123 | 576 | -0.506 | 0.613 |
| High:M6 | 0.049 | 0.091 | 576 | 0.534 | 0.594 |
| Mixed:M6 | -0.023 | 0.092 | 576 | -0.249 | 0.803 |
| None:M6 | 0.003 | 0.094 | 576 | 0.034 | 0.973 |
| High:U20 | 0.248 | 0.180 | 576 | 1.377 | 0.169 |
| Mixed:U20 | 0.097 | 0.149 | 576 | 0.654 | 0.513 |
| None:U20 | 0.056 | 0.156 | 576 | 0.360 | 0.719 |
| High:U4 | 0.227 | 0.131 | 576 | 1.734 | 0.084 |
| Mixed:U4 | -0.094 | 0.144 | 576 | -0.652 | 0.514 |
| None:U4 | 0.043 | 0.136 | 576 | 0.317 | 0.751 |
| High:U5 | -0.032 | 0.089 | 576 | -0.365 | 0.716 |
| Mixed:U5 | -0.117 | 0.090 | 576 | -1.293 | 0.197 |
| None:U5 | -0.012 | 0.085 | 576 | -0.141 | 0.888 |
| Fun-β |  |  |  |  |  |
| Intercept | 0.524 | 0.037 | 254.500 | 14.090 | <0.001 |
| High | 0.009 | 0.052 | 574.076 | 0.170 | 0.865 |
| Mixed | 0.086 | 0.054 | 572.855 | 1.581 | 0.114 |
| **None** | **0.138** | **0.051** | **575.627** | **2.714** | **0.007** |
| M25 | 0.183 | 0.076 | 572.730 | 2.420 | 0.016 |
| M6 | 0.069 | 0.055 | 569.695 | 1.256 | 0.209 |
| U20 | 0.064 | 0.101 | 574.349 | 0.637 | 0.525 |
| U4 | 0.091 | 0.081 | 573.424 | 1.115 | 0.266 |
| U5 | 0.094 | 0.049 | 483.059 | 1.909 | 0.057 |
| High:M25 | -0.064 | 0.099 | 575.912 | -0.647 | 0.518 |
| Mixed:M25 | -0.132 | 0.104 | 575.677 | -1.266 | 0.206 |
| None:M25 | -0.127 | 0.101 | 575.800 | -1.253 | 0.211 |
| High:M6 | -0.031 | 0.075 | 575.923 | -0.415 | 0.678 |
| Mixed:M6 | -0.049 | 0.076 | 574.904 | -0.640 | 0.522 |
| None:M6 | -0.131 | 0.078 | 574.013 | -1.678 | 0.094 |
| High:U20 | 0.014 | 0.148 | 574.857 | 0.096 | 0.923 |
| Mixed:U20 | -0.026 | 0.123 | 575.900 | -0.210 | 0.834 |
| None:U20 | -0.128 | 0.129 | 570.636 | -0.990 | 0.323 |
| High:U4 | 0.057 | 0.108 | 575.952 | 0.524 | 0.600 |
| Mixed:U4 | -0.012 | 0.118 | 574.740 | -0.100 | 0.921 |
| None:U4 | -0.131 | 0.113 | 573.080 | -1.161 | 0.246 |
| High:U5 | -0.118 | 0.073 | 574.386 | -1.618 | 0.106 |
| Mixed:U5 | -0.060 | 0.074 | 572.277 | -0.814 | 0.416 |
| **None:U5** | **-0.197** | **0.070** | **574.795** | **-2.817** | **0.005** |

Table A6. Full outputs of the mixed models of changes in within plot spatial functional temporal beta diversity through time. t and p values represent contrasts with the Continued treatment, df=20. Functional beta diversity is divided into functional turnover Fun-βturn and nestedness-resultant functional dissimilarity Fun-βnest and their sum Fun-β. Contrasts where p ≤ 0.05 are shown in bold.

|  | Estimate | Std. Error | df | t value | Pr>|t| |
| --- | --- | --- | --- | --- | --- |
| Fun-βturn |  |  |  |  |  |
| Intercept | 3.983 | 4.341 | 20.001 | 0.918 | 0.370 |
| High | 10.939 | 6.139 | 20.001 | 1.782 | 0.090 |
| Mixed | 8.751 | 6.139 | 20.001 | 1.425 | 0.170 |
| None | 5.198 | 6.139 | 20.001 | 0.847 | 0.407 |
| Year | -0.002 | 0.002 | 20.000 | -0.830 | 0.416 |
| High:Year | -0.005 | 0.003 | 20.000 | -1.790 | 0.089 |
| Mixed:Year | -0.004 | 0.003 | 19.999 | -1.426 | 0.169 |
| None:Year | -0.003 | 0.003 | 20.000 | -0.843 | 0.409 |
| Fun-βnest |  |  |  |  |  |
| Intercept | -5.043 | 3.656 | 35.001 | -1.379 | 0.177 |
| High | 6.800 | 5.171 | 35.000 | 1.315 | 0.197 |
| Mixed | 1.958 | 5.171 | 35.000 | 0.379 | 0.707 |
| None | 0.940 | 5.171 | 35.000 | 0.182 | 0.857 |
| Year | 0.003 | 0.002 | 35.000 | 1.459 | 0.153 |
| High:Year | -0.003 | 0.003 | 35.000 | -1.319 | 0.196 |
| Mixed:Year | -0.001 | 0.003 | 35.000 | -0.380 | 0.707 |
| None:Year | 0.000 | 0.003 | 35.000 | -0.187 | 0.852 |
| Fun-β |  |  |  |  |  |
| Intercept | -1.060 | 3.659 | 20.000 | -0.290 | 0.775 |
| **High** | **17.739** | **5.174** | **20.000** | **3.428** | **0.003** |
| Mixed | 10.709 | 5.174 | 20.000 | 2.070 | 0.052 |
| None | 6.138 | 5.174 | 20.000 | 1.186 | 0.249 |
| Year | 0.001 | 0.002 | 19.999 | 0.473 | 0.641 |
| **High:Year** | **-0.009** | **0.003** | **19.999** | **-3.442** | **0.003** |
| Mixed:Year | -0.005 | 0.003 | 19.999 | -2.071 | 0.052 |
| None:Year | -0.003 | 0.003 | 19.999 | -1.188 | 0.249 |
